# Supplementary material
Source: PubMed Central journal article supplement (PMC2612065)
Supplement: 080486v2_1.pdf [file 080486v2_1.pdf]

**Appendix 1** (as supplied by the authors): Specific details of search strings, June 2008

**PubMed**

("rosiglitazone"[Substance Name] OR "rosiglitazone"[All Fields]) OR ("pioglitazone"[Substance Name] OR "pioglitazone"[All Fields]) OR ("troglitazone"[Substance Name] OR "troglitazone"[All Fields]) AND Randomized Controlled Trial[ptyp]

(pioglitazone or rosiglitazone or troglitazone or thiazolidinedione\$) and (bone or fracture\$)

**EMBASE**

(troglitazone or pioglitazone or rosiglitazone or thiazolidinedione\*).mp. [mp=title, abstract, subject headings, heading word, drug trade name, original title, device manufacturer, drug manufacturer name] AND (bone or fracture).mp. [mp=title, abstract, subject headings, heading word, drug trade name, original title, device manufacturer, drug manufacturer name] AND "Human" [Subjects]

(pioglitazone or rosiglitazone or troglitazone) {Including Related Terms} AND trial.mp [mp=title, abstract, subject headings, heading word, drug trade name, original title, device manufacturer, drug manufacturer name] AND "Human" [Subjects]

**Cochrane Controlled Trials Register**

Pioglitazone or rosiglitazone or troglitazone
