# Supplementary material
Source: PubMed Central journal article supplement (PMC2612065)
Supplement: 080486v2_2.pdf [file 080486v2_2.pdf]

**Appendix 2** (as supplied by the authors): Characteristics of randomized controlled trials included in the evaluation of fractures

| Study                                          | Design                                        | Participants                                                                                                               | Thiazolidinedione and comparator                              | Treatment duration | Fracture in thiazolidinedione arm   | Fractures in control arm            | Monitoring for adverse effects                                                                                                                                                                                                                                                                                                                                                    |
|------------------------------------------------|-----------------------------------------------|----------------------------------------------------------------------------------------------------------------------------|---------------------------------------------------------------|--------------------|-------------------------------------|-------------------------------------|-----------------------------------------------------------------------------------------------------------------------------------------------------------------------------------------------------------------------------------------------------------------------------------------------------------------------------------------------------------------------------------|
| <b>Kahn 2006 (ADOPT)</b> <sup>1,2</sup>        | Double-blind, adequate allocation concealment | Type 2 dDiabetes mellitus, diagnosed within past 3 years, treated with diet and exercise only. Mean age 56 years.          | Rosiglitazone versus metformin or glibenclamide               | 4 years            | Women: 60/645<br><br>Men: 32/811    | Women: 51/1195<br><br>Men: 57/1700  | Investigators looked for adverse events at every study visit. Patients were asked to report number of emergency room visits and hospitalizations, and any days where their activity had been restricted. Baseline characteristics were similar between both groups for ethnicity, disease duration, HbA <sub>1c</sub> and BMI.                                                    |
| <b>Dormandy 2006 (PROActiv)</b> <sup>3,4</sup> | Double-blind, adequate allocation concealment | Type 2 diabetes (median duration 8 years), with known vascular disease. Mean age 62 years. About one-third was on insulin. | Pioglitazone versus placebo                                   | 3.5 years          | Women: 44/870*<br><br>Men: 30/1735* | Women: 23/905*<br><br>Men: 37/1728* | Investigators enquired about adverse events at every study visit. Trial monitors also regularly checked the patients' trial records to ensure that serious adverse events were being reported. Serious events were then checked against the clinical notes. Baseline characteristics were similar between both groups for ethnicity, disease duration, HbA <sub>1c</sub> and BMI. |
| <b>AVM100264</b> <sup>5</sup>                  | Double-blind, unclear allocation concealment  | Type 2 diabetes mellitus                                                                                                   | Rosiglitazone and metformin versus.sulfonylurea and metformin | 1 year             | 2/294                               | 1/301                               | Not stated. Baseline characteristics not given.                                                                                                                                                                                                                                                                                                                                   |
| <b>GSK 049653 334</b> <sup>6</sup>             | Double-blind, adequate allocation concealment | Insulin resistance syndrome and Type 2 diabetes                                                                            | Rosiglitazone versus placebo                                  | 1 year             | 0/277                               | 3/278                               | "Adverse events, laboratory findings and vital signs were closely monitored." Baseline characteristics were similar between both groups for disease duration, HbA <sub>1c</sub> and BMI.                                                                                                                                                                                          |

|                                             |                                               |                                                                            |                                                                   |           |                            |                            |                                                                                                                                                                                                                                                                                                                             |
|---------------------------------------------|-----------------------------------------------|----------------------------------------------------------------------------|-------------------------------------------------------------------|-----------|----------------------------|----------------------------|-----------------------------------------------------------------------------------------------------------------------------------------------------------------------------------------------------------------------------------------------------------------------------------------------------------------------------|
| <b>GSK 049653 351</b> <sup>7</sup>          | Double-blind, unclear allocation concealment  | Type 2 diabetes mellitus with co-existing vascular disease or hypertension | Rosiglitazone versus placebo                                      | 1 year    | 0/30                       | 1/30                       | Not stated                                                                                                                                                                                                                                                                                                                  |
| <b>Jain 2006</b> <sup>8</sup>               | Double-blind, unclear allocation concealment  | Type 2 diabetes mellitus                                                   | Pioglitazone versus glibenclamide                                 | 1 year    | 0/251                      | 2/251                      | "Adverse events, serious adverse events, and hypoglycemic events were recorded at each visit. Any untoward medical event concurrent with the use of the study drugs was considered an adverse event." Baseline characteristics were similar between both groups for ethnicity, disease duration, HbA <sub>1c</sub> and BMI. |
| <b>Nissen 2008 (PERISCOPE)</b> <sup>9</sup> | Double-blind, adequate allocation concealment | Type 2 diabetes mellitus                                                   | Pioglitazone versus glimepiride                                   | 18 months | Women: 6/84<br>Men: 2/186  | Women: 0/93<br>Men: 0/180  | Investigators reported listed adverse events, including hypoglycemia, angina pectoris, peripheral edema, hypertension and bone fractures. Baseline characteristics were similar between both groups for ethnicity, disease duration, HbA <sub>1c</sub> and BMI.                                                             |
| <b>DeFronzo 2008 (ACTNow)</b> <sup>10</sup> | Double-blind, unclear allocation concealment  | Impaired glucose tolerance                                                 | Pioglitazone versus placebo                                       | 2.5 years | 8/303                      | 8/299                      | Adverse events were collected as secondary outcomes. Baseline characteristics not given.                                                                                                                                                                                                                                    |
| <b>Seufert (a) 2008</b> <sup>11</sup>       | Double-blind, adequate allocation concealment | Type 2 diabetes mellitus                                                   | Pioglitazone plus metformin versus gliclazide plus metformin      | 2 years   | Women: 1/156<br>Men: 0/161 | Women: 1/159<br>Men: 0/154 | Tolerability and safety assessed by monitoring adverse events, physical examination and vital signs and standard clinical laboratory tests. Baseline characteristics were similar between both groups for ethnicity, disease duration, HbA <sub>1c</sub> and BMI.                                                           |
| <b>Seufert (b) 2008</b> <sup>11</sup>       | Double-blind, adequate allocation concealment | Type 2 diabetes mellitus                                                   | Pioglitazone plus sulfonylurea versus metformin plus sulfonylurea | 2 years   | Women: 0/148<br>Men: 0/171 | Women: 1/145<br>Men: 1/175 | Tolerability and safety assessed by monitoring adverse events, physical examination and vital signs and standard clinical laboratory tests. Baseline characteristics were similar between both groups for ethnicity, disease duration, HbA <sub>1c</sub> and BMI.                                                           |

\*We extracted fracture data from the manufacturer's product information for the PROactive study, as the data on fractures remain unpublished.<sup>3</sup>

## References

1. Kahn SE, Haffner SM, Heise MA, et al.; ADOPT Study Group. Glycemic durability of rosiglitazone, metformin, or glyburide monotherapy [erratum in *N Engl J Med* 2007; 356:1387-8]. *N Engl J Med* 2006;355:2427-43.
2. Kahn SE, Zinman B, Lachin JM, et al.; ADOPT Study Group. Rosiglitazone Associated fractures in type 2 diabetes: an analysis from ADOPT. *Diabetes Care* 2008;31:845-51.
3. Dormandy JA, Charbonnel B, Eckland DJ, et al. Secondary prevention of macrovascular events in patients with type 2 diabetes in the PROactive study (PROspective pioglitazone clinical trial in macrovascular events): a randomised controlled trial. *Lancet* 2005;366:1279-89.
4. Actos prescribing information. Deerfield (Illinois): Takeda Pharmaceuticals America Inc.; 2007. Available: [www.actos.com/actos/prescribinginfo.aspx](http://www.actos.com/actos/prescribinginfo.aspx) (accessed 2008 Jul 13).
5. A randomised, multi-centre, phase IV, double-blind, parallel group study comparing the effects of 52 weeks' administration of AVANDAMET and metformin plus sulphonylurea on change in HbA1c from baseline in overweight type 2 diabetics poorly controlled on metformin [study no AVM100264]. Brentford (UK): GlaxoSmithKline; 2008. Available: <http://ctr.gsk.co.uk/Summary/rosiglitazone/studylist.asp> (accessed 2008 Jul 13).
6. RAS Rosiglitazone and Atherosclerosis Study: a 1 year randomised, double-blind, parallel group, placebo controlled study to evaluate the efficacy of rosiglitazone on the progression of intima-media thickness in the carotid artery in subjects with insulin resistance syndrome and/or type 2 diabetes mellitus [study no 049653/334]. Brentford (UK): GlaxoSmithKline; 2008. Available: <http://ctr.gsk.co.uk/Summary/rosiglitazone/studylist.asp> (accessed 2008 Jul 13).
7. Rosiglitazone and Plaque Study: a 12 month randomised, double-blind, placebo-controlled, magnetic resonance imaging study to evaluate the effect of rosiglitazone on the structure and composition of carotid atherosclerotic plaques in subjects with type 2 diabetes mellitus and coexisting vascular disease or hypertension [study no 049653/351]. Brentford (UK): GlaxoSmithKline; 2008. Available: <http://ctr.gsk.co.uk/Summary/rosiglitazone/studylist.asp> (accessed 2008 Jul 13).
8. Jain R, Osei K, Kupfer S, et al. Long-term safety of pioglitazone versus glyburide in patients with recently diagnosed type 2 diabetes mellitus study no 049653/351. *Pharmacotherapy* 2006;26:1388-95.
9. Nissen SE, Nicholls SJ, Wolski K, et al. PERISCOPE Investigators. Comparison of pioglitazone vs glimepiride on progression of coronary atherosclerosis in patients with type 2 diabetes: the PERISCOPE randomized controlled trial. *JAMA* 2008;299:1561-73.
10. DeFronzo RA. Actos Now for Prevention of Diabetes (ACT NOW). NCT00220961. Proceedings of the American Diabetes Association 68th Scientific Sessions: Late Breaking Clinical Studies. 2008 Jun 6–10; San Francisco. Alexandria (VA): The American Diabetes Association; 2008.
11. Seufert J, Urquhart R. 2-year effects of pioglitazone add-on to sulfonylurea or metformin on oral glucose tolerance in patients with type 2 diabetes. *Diabetes Res Clin Pract* 2008;79:453-60.
