# Supplementary material
Source: PubMed Central journal article supplement (PMC2612065)
Supplement: 080486v2_4.pdf [file 080486v2_4.pdf]

**Appendix 4** (as supplied by the authors): Rates of spine, hip and limb fractures from 5 trials\*<sup>+</sup>

| Site of Fracture                       |               | Thiazolidinedione | Control         |
|----------------------------------------|---------------|-------------------|-----------------|
| <b>Spine</b>                           | Kahn 2006     | 4 /1456 (0.27%)   | 3/2895 (0.10%)  |
|                                        | Other trials  | No events         | No events       |
| <b>Hip/ Femur</b>                      | Kahn 2006     | 3/1456 (0.21%)    | 3/2895 (0.10%)  |
|                                        | Hedblad 2007  | 0/277 (0%)        | 1/278 (0.36%)   |
|                                        | AVM 100264    | 1/294 (0.34%)     | 1/301 (0.33%)   |
|                                        | Other trials  | No events         | No events       |
| <b>Unspecified or Other Lower Limb</b> | Kahn 2006     | 43/1456 (2.95%)   | 52/2895 (1.80%) |
|                                        | Jain 2006     | 0/251 (0%)        | 2/252 (0.79%)   |
|                                        | Nissen 2008   | 7/270 (2.59%)     | 0/273 (0%)      |
|                                        | Other trials  | No events         | No events       |
| <b>Upper Limb</b>                      | Kahn 2006     | 13/1456 (0.89%)   | 13/2895 (0.45%) |
|                                        | Hedblad 2007  | 0/277 (0%)        | 2/278 (0.72%)   |
|                                        | Nissen 2008   | 4/270 (1.48%)     | 0/273 (0%)      |
|                                        | AVM 100264    | 1/294 (0.34%)     | 0/301 (0%)      |
|                                        | GSK 49653 351 | 0/30 (0%)         | 1/31 (3%)       |
|                                        | Other trials  | No events         | No events       |

\*Two trials did not specify the exact fracture sites

+Some patients may have had fractures at more than one site
